# Supplementary material for: Childhood Maltreatment and Its Interaction with Hypothalamic–Pituitary–Adrenal Axis Activity and the Remission Status of Major Depression: Effects on Functionality and Quality of Life
Source: MDPI journal article supplement (doi:10.3390/brainsci11040495), 2021-04-13
Supplement: s1 [file s1]

**Table S5.** Results of multiple linear regression analyses exploring the association of childhood maltreatment, HPA axis function, and MDD remission status with disability (SASS) in MDD patients (n=97).

|                                                    | Model 1<br>R <sup>2</sup> = 0.094 |       | Model 2<br>R <sup>2</sup> = 0.517 |       | Model 3<br>R <sup>2</sup> = 0.611 |       | Model 4<br>R <sup>2</sup> = 0.623 |       | Final model<br>R <sup>2</sup> = 0.740 |       |
|----------------------------------------------------|-----------------------------------|-------|-----------------------------------|-------|-----------------------------------|-------|-----------------------------------|-------|---------------------------------------|-------|
|                                                    | β                                 | p     | β                                 | p     | β                                 | p     | β                                 | p     | β                                     | P     |
| CTQ- emotional abuse                               | -0.033                            | 0.873 | 0.171                             | 0.293 | 0.153                             | 0.398 | 0.166                             | 0.414 | 0.158                                 | 0.365 |
| CTQ- physical abuse                                | -0.013                            | 0.942 | -0.119                            | 0.380 | -0.157                            | 0.314 | -0.163                            | 0.343 | -0.372                                | 0.024 |
| CTQ- sexual abuse                                  | 0.095                             | 0.520 | 0.034                             | 0.759 | 0.034                             | 0.771 | 0.026                             | 0.840 | -0.079                                | 0.496 |
| CTQ- emotional neglect                             | -0.333                            | 0.064 | -0.095                            | 0.498 | -0.081                            | 0.573 | -0.073                            | 0.649 | 0.636                                 | 0.013 |
| CTQ- physical neglect                              | 0.114                             | 0.486 | 0.004                             | 0.973 | 0.003                             | 0.982 | 0.001                             | 0.993 | -0.108                                | 0.380 |
| STAI - state                                       |                                   |       | -0.459                            | 0.002 | -0.269                            | 0.104 | -0.297                            | 0.090 | -0.312                                | 0.039 |
| STAI - trait                                       |                                   |       | -0.312                            | 0.060 | -0.256                            | 0.154 | -0.257                            | 0.211 | -0.462                                | 0.015 |
| Gender                                             |                                   |       |                                   |       | 0.085                             | 0.474 | 0.075                             | 0.552 | 0.050                                 | 0.648 |
| Age                                                |                                   |       |                                   |       | -0.061                            | 0.678 | -0.067                            | 0.661 | -0.120                                | 0.387 |
| Years of education                                 |                                   |       |                                   |       | -0.057                            | 0.653 | -0.091                            | 0.506 | -0.020                                | 0.864 |
| BMI                                                |                                   |       |                                   |       | -0.242                            | 0.050 | -0.213                            | 0.130 | -0.203                                | 0.100 |
| Tobacco consumption (cig/day)                      |                                   |       |                                   |       | -0.091                            | 0.446 | -0.104                            | 0.422 | -0.338                                | 0.013 |
| Remitted MDD                                       |                                   |       |                                   |       | 0.121                             | 0.415 | 0.131                             | 0.408 | 0.159                                 | 0.256 |
| PSQI                                               |                                   |       |                                   |       | -0.152                            | 0.330 | -0.113                            | 0.522 | 0.155                                 | 0.367 |
| Waking cortisol                                    |                                   |       |                                   |       |                                   |       | 0.068                             | 0.637 | 0.175                                 | 0.188 |
| CAR                                                |                                   |       |                                   |       |                                   |       | 0.100                             | 0.521 | 0.239                                 | 0.094 |
| DSTR                                               |                                   |       |                                   |       |                                   |       | 0.056                             | 0.662 | 0.031                                 | 0.777 |
| Diurnal cortisol slope                             |                                   |       |                                   |       |                                   |       | 0.122                             | 0.349 | -10.135                               | 0.011 |
| Diurnal cortisol slope x CTQ-<br>emotional neglect |                                   |       |                                   |       |                                   |       |                                   |       | 10.462                                | 0.004 |
| DSTR x Remitted MDD                                |                                   |       |                                   |       |                                   |       |                                   |       | 0.232                                 | 0.028 |

SASS score was considered as the dependent variable.

β: standardized beta coefficient.

Abbreviations: MDD, major depressive disorder; SASS, Social Adaptation Self-evaluation Scale; CTQ, Childhood Trauma Questionnaire; STAI: State-Trait Anxiety Inventory; BMI, body mass index; PSQI, Pittsburgh Sleep Quality Index; CAR, cortisol awakening response calculated to the increase in cortisol; DSTR, dexamethasone suppression test ratio.

Analyses performed using transformed cortisol variables, outliers excluded.

Non-significant interaction terms were excluded in the final equation.
