# Supplementary material for: Childhood Maltreatment and Its Interaction with Hypothalamic–Pituitary–Adrenal Axis Activity and the Remission Status of Major Depression: Effects on Functionality and Quality of Life
Source: MDPI journal article supplement (doi:10.3390/brainsci11040495), 2021-04-13
Supplement: s1 [file s1]

**Table S7.** Results of multiple linear regression analyses exploring the association of childhood maltreatment, HPA axis function, and MDD remission status with quality of life (EQ-VAS) in MDD patients (n=97).

|                               | Model 1<br>R <sup>2</sup> = 0.164 |       | Model 2<br>R <sup>2</sup> = 0.675 |        | Model 3<br>R <sup>2</sup> = 0.743 |       | Final model 4<br>R <sup>2</sup> = 0.805 |       |
|-------------------------------|-----------------------------------|-------|-----------------------------------|--------|-----------------------------------|-------|-----------------------------------------|-------|
|                               | $\beta$                           | p     | $\beta$                           | p      | $\beta$                           | p     | $\beta$                                 | p     |
| CTQ- emotional abuse          | -0.389                            | 0.066 | -0.140                            | 0.322  | -0.131                            | 0.445 | -0.222                                  | 0.198 |
| CTQ- physical abuse           | 0.291                             | 0.101 | 0.147                             | 0.211  | 0.136                             | 0.345 | 0.166                                   | 0.236 |
| CTQ- sexual abuse             | 0.072                             | 0.628 | -0.012                            | 0.900  | -0.019                            | 0.851 | -0.016                                  | 0.872 |
| CTQ- emotional neglect        | -0.274                            | 0.121 | -0.010                            | 0.935  | -0.023                            | 0.851 | -0.057                                  | 0.641 |
| CTQ- physical neglect         | 0.197                             | 0.228 | 0.074                             | 0.484  | 0.090                             | 0.426 | 0.063                                   | 0.552 |
| STAI - state                  |                                   |       | -0.472                            | <0.001 | -0.311                            | 0.029 | -0.365                                  | 0.008 |
| STAI - trait                  |                                   |       | -0.383                            | 0.008  | -0.332                            | 0.031 | -0.170                                  | 0.283 |
| Gender                        |                                   |       |                                   |        | 0.098                             | 0.332 | 0.083                                   | 0.380 |
| Age                           |                                   |       |                                   |        | -0.068                            | 0.607 | -0.170                                  | 0.196 |
| Years of education            |                                   |       |                                   |        | -0.025                            | 0.810 | -0.089                                  | 0.385 |
| BMI                           |                                   |       |                                   |        | -0.109                            | 0.289 | -0.129                                  | 0.218 |
| Tobacco consumption (cig/day) |                                   |       |                                   |        | -0.125                            | 0.216 | -0.129                                  | 0.188 |
| Remitted MDD                  |                                   |       |                                   |        | 0.211                             | 0.111 | 0.236                                   | 0.057 |
| PSQI                          |                                   |       |                                   |        | -0.086                            | 0.512 | -0.145                                  | 0.292 |
| Waking cortisol               |                                   |       |                                   |        |                                   |       | 0.067                                   | 0.511 |
| CAR                           |                                   |       |                                   |        |                                   |       | -0.089                                  | 0.459 |
| DSTR                          |                                   |       |                                   |        |                                   |       | 0.036                                   | 0.713 |
| Diurnal cortisol slope        |                                   |       |                                   |        |                                   |       | 0.244                                   | 0.014 |

EQ-5D – Index score was considered as the dependent variable.

$\beta$ : standardized beta coefficient.

Abbreviations: MDD, major depressive disorder; EQ-5D, Euro Quality of Life 5-dimensions questionnaire; VAS: visual analogue scale; CTQ, Childhood Trauma Questionnaire; STAI, State-Trait Anxiety Inventory; BMI, body mass index; PSQI, Pittsburgh Sleep Quality Index; CAR, cortisol awakening response calculated to the increase in cortisol; DSTR, dexamethasone suppression test ratio.

Analyses performed using transformed cortisol variables, outliers excluded.

No significant interaction terms between HPA axis measures, CTQ variables or depression remission status were found in the analysis.
