# Supplementary material for: Childhood Maltreatment and Its Interaction with Hypothalamic–Pituitary–Adrenal Axis Activity and the Remission Status of Major Depression: Effects on Functionality and Quality of Life
Source: MDPI journal article supplement (doi:10.3390/brainsci11040495), 2021-04-13
Supplement: s1 [file s1]

**Table S2.** Results of partial correlation analyses in healthy controls.

|                         | CTQ -<br>emotional<br>abuse | CTQ -<br>physical<br>abuse | CTQ -<br>sexual<br>abuse | CTQ -<br>emotional<br>neglect | CTQ -<br>physical<br>neglect | CTQ -<br>total<br>score | STAI -<br>state | STAI -<br>trait | Waking<br>cortisol<br>(nmol/L) | †CAR     | ‡DSTR    | Diurnal<br>cortisol<br>slope | SASS    | EQ-5D –<br>Index | EQ-5D –<br>VAS |
|-------------------------|-----------------------------|----------------------------|--------------------------|-------------------------------|------------------------------|-------------------------|-----------------|-----------------|--------------------------------|----------|----------|------------------------------|---------|------------------|----------------|
| CTQ - emotional abuse   | 1                           | 0.585**                    | 0.240*                   | 0.442**                       | 0.468**                      | 0.806*                  | -0.058          | 0.022           | 0.011                          | 0.086    | 0.009    | -0.067                       | -0.116  | -0.079           | 0.130          |
| CTQ - physical abuse    | 0.585**                     | 1                          | 0.012                    | 0.190                         | 0.199                        | 0.530*                  | -0.054          | -0.036          | -0.050                         | 0.111    | -0.081   | -0.074                       | -0.064  | -0.020           | 0.038          |
| CTQ - sexual abuse      | 0.240*                      | 0.012                      | 1                        | 0.194                         | 0.117                        | 0.359*                  | -0.008          | -0.022          | 0.028                          | 0.106    | -0.101   | 0.079                        | 0.040   | 0.049            | 0.024          |
| CTQ - emotional neglect | 0.442**                     | 0.190                      | 0.194                    | 1                             | 0.582**                      | 0.835*                  | -0.093          | 0.056           | -0.065                         | -0.067   | -0.142   | 0.192                        | 0.011   | 0.050            | 0.081          |
| CTQ - physical neglect  | 0.468**                     | 0.199                      | 0.117                    | 0.582**                       | 1                            | 0.723*                  | -0.280*         | -0.073          | -0.052                         | -0.039   | -0.038   | 0.122                        | 0.052   | 0.197            | 0.177          |
| CTQ - total score       | 0.806**                     | 0.530**                    | 0.359**                  | 0.835**                       | 0.723**                      | 1                       | -0.140          | 0.008           | -0.045                         | 0.025    | -0.107   | 0.097                        | -0.028  | 0.046            | 0.134          |
| STAI - state            | -0.058                      | -0.054                     | -0.008                   | -0.093                        | -0.280*                      | -0.140                  | 1               | 0.656**         | 0.088                          | -0.076   | 0.149    | -0.133                       | -0.173  | -0.410**         | -0.241*        |
| STAI - trait            | 0.022                       | -0.036                     | -0.022                   | 0.056                         | -0.073                       | 0.008                   | 0.656**         | 1               | 0.008                          | -0.071   | 0.187    | -0.172                       | -0.251* | -0.429**         | -0.332**       |
| Waking cortisol         | 0.011                       | -0.050                     | 0.028                    | -0.065                        | -0.052                       | -0.045                  | 0.088           | 0.008           | 1                              | -0.565** | -0.092   | -0.087                       | -0.184  | 0.107            | 0.027          |
| †CAR                    | 0.086                       | 0.111                      | 0.106                    | -0.067                        | -0.039                       | 0.025                   | -0.076          | -0.071          | -0.565**                       | 1        | 0.334**  | -0.252*                      | 0.009   | 0.104            | 0.075          |
| ‡DSTR                   | 0.009                       | -0.081                     | -0.101                   | -0.142                        | -0.038                       | -0.107                  | 0.149           | 0.187           | -0.092                         | 0.334**  | 1        | -0.393**                     | -0.008  | 0.048            | -0.065         |
| Diurnal cortisol slope  | -0.067                      | -0.074                     | 0.079                    | 0.192                         | 0.122                        | 0.097                   | -0.133          | -0.172          | -0.087                         | -0.252*  | -0.393** | 1                            | 0.135   | -0.004           | 0.078          |
| SASS                    | -0.116                      | -0.064                     | 0.040                    | 0.011                         | 0.052                        | -0.028                  | -0.173          | -0.251*         | -0.184                         | 0.009    | -0.008   | 0.135                        | 1       | 0.241*           | 0.187          |
| EQ-5D – Index           | -0.079                      | -0.020                     | 0.049                    | 0.050                         | 0.197                        | 0.046                   | -0.410**        | -0.429**        | 0.107                          | 0.104    | 0.048    | -0.004                       | 0.241*  | 1                | 0.530**        |
| EQ-5D – VAS             | 0.130                       | 0.038                      | 0.024                    | 0.081                         | 0.177                        | 0.134                   | -0.241*         | -0.332**        | 0.027                          | 0.075    | -0.065   | 0.078                        | 0.187   | 0.530**          | 1              |

Partial correlation analyses adjusted by gender, age, and years of education.

Pearson's correlation coefficients are shown. Significant results are marked with asterisks (\*  $p < 0.05$ ; \*\*  $p < 0.01$ ).

Abbreviations: CTQ, Childhood Trauma Questionnaire; STAI: State-Trait Anxiety Inventory; CAR, cortisol awakening response calculated to the increase; DSTR, dexamethasone suppression test ratio; SASS, Social Adaptation Self-evaluation Scale; EQ-5D, Euro Quality of Life 5-dimensions questionnaire; VAS, Visual Analogue Scale. Correlations between cortisol values calculated from transformed variables, outliers excluded.
