# Supplementary material for: Childhood Maltreatment and Its Interaction with Hypothalamic–Pituitary–Adrenal Axis Activity and the Remission Status of Major Depression: Effects on Functionality and Quality of Life
Source: MDPI journal article supplement (doi:10.3390/brainsci11040495), 2021-04-13
Supplement: s1 [file s1]

**Table S4.** Results of partial correlation analyses in patients with non-remitted MDD.

|                         | CTQ -<br>emotion<br>al abuse | CTQ -<br>physical<br>abuse | CTQ -<br>sexual<br>abuse | CTQ -<br>emotional<br>neglect | CTQ -<br>physical<br>neglect | CTQ -<br>total<br>score | STAI -<br>state | STAI -<br>trait | Waking<br>cortisol<br>(nmol/L) | †CAR     | ‡DSTR  | Diurnal<br>cortisol<br>slope | SASS     | EQ-5D –<br>Index | EQ-5D –<br>VAS |
|-------------------------|------------------------------|----------------------------|--------------------------|-------------------------------|------------------------------|-------------------------|-----------------|-----------------|--------------------------------|----------|--------|------------------------------|----------|------------------|----------------|
| CTQ - emotional abuse   | 1                            | 0.697**                    | 0.498**                  | 0.570**                       | 0.725**                      | 0.899*                  | -0.144          | 0.168           | -0.207                         | -0.118   | -0.107 | 0.358                        | 0.198    | -0.196           | -0.019         |
| CTQ - physical abuse    | 0.697**                      | 1                          | 0.632**                  | 0.277                         | 0.499**                      | 0.801*                  | 0.161           | 0.139           | -0.053                         | 0.037    | -0.043 | 0.199                        | 0.089    | -0.262           | -0.144         |
| CTQ - sexual abuse      | 0.498**                      | 0.632**                    | 1                        | 0.215                         | 0.590**                      | 0.729*                  | 0.131           | 0.316           | -0.001                         | 0.171    | 0.141  | 0.010                        | 0.141    | -0.347           | -0.259         |
| CTQ - emotional neglect | 0.570**                      | 0.277                      | 0.215                    | 1                             | 0.595**                      | 0.673*                  | 0.060           | 0.292           | 0.197                          | -0.398*  | -0.015 | 0.110                        | -0.149   | -0.154           | -0.112         |
| CTQ - physical neglect  | 0.725**                      | 0.499**                    | 0.590**                  | 0.595**                       | 1                            | 0.842*                  | 0.012           | 0.343           | -0.155                         | -0.095   | -0.096 | 0.223                        | 0.111    | -0.160           | -0.198         |
| CTQ - total score       | 0.899**                      | 0.801**                    | 0.729**                  | 0.673**                       | 0.842**                      | 1                       | 0.048           | 0.305           | -0.057                         | -0.107   | -0.033 | 0.237                        | 0.101    | -0.283           | -0.173         |
| STAI - state            | -0.144                       | 0.161                      | 0.131                    | 0.060                         | 0.012                        | 0.048                   | 1               | 0.426*          | 0.176                          | -0.046   | -0.180 | -0.053                       | -0.468** | -0.369*          | -0.576**       |
| STAI - trait            | 0.168                        | 0.139                      | 0.316                    | 0.292                         | 0.343                        | 0.305                   | 0.426*          | 1               | 0.038                          | -0.103   | 0.202  | -0.165                       | -0.343   | -0.508**         | -0.495**       |
| Waking cortisol         | -0.207                       | -0.053                     | -0.001                   | 0.197                         | -0.155                       | -0.057                  | 0.176           | 0.038           | 1                              | -0.468** | 0.284  | -0.150                       | -0.143   | 0.135            | 0.023          |
| †CAR                    | -0.118                       | 0.037                      | 0.171                    | -0.398*                       | -0.095                       | -0.107                  | -0.046          | -0.103          | -0.468**                       | 1        | -0.063 | -0.191                       | 0.251    | -0.036           | -0.121         |
| ‡DSTR                   | -0.107                       | -0.043                     | 0.141                    | -0.015                        | -0.096                       | -0.033                  | -0.180          | 0.202           | 0.284                          | -0.063   | 1      | -0.252                       | 0.291    | -0.012           | 0.097          |
| Diurnal cortisol slope  | 0.358                        | 0.199                      | 0.010                    | 0.110                         | 0.223                        | 0.237                   | -0.053          | -0.165          | -0.150                         | -0.191   | -0.252 | 1                            | 0.240    | 0.121            | 0.230          |
| SASS                    | 0.198                        | 0.089                      | 0.141                    | -0.149                        | 0.111                        | 0.101                   | -0.468**        | -0.343          | -0.143                         | 0.251    | 0.291  | 0.240                        | 1        | 0.421*           | 0.558**        |
| EQ-5D – Index           | -0.196                       | -0.262                     | -0.347                   | -0.154                        | -0.160                       | -0.283                  | -0.369*         | -0.508**        | 0.135                          | -0.036   | -0.012 | 0.121                        | 0.421*   | 1                | 0.704**        |
| EQ-5D – VAS             | -0.019                       | -0.144                     | -0.259                   | -0.112                        | -0.198                       | -0.173                  | -0.576**        | -0.495**        | 0.023                          | -0.121   | 0.097  | 0.230                        | 0.558**  | 0.704**          | 1              |

Partial correlation analyses adjusted by gender, age, and years of education.

Pearson's correlation coefficients are shown. Significant results are marked with asterisks (\*  $p < 0.05$ ; \*\*  $p < 0.01$ ).

Abbreviations: MDD, major depressive disorder; CTQ, Childhood Trauma Questionnaire; STAI: State-Trait Anxiety Inventory; CAR, cortisol awakening response calculated to the increase; DSTR, dexamethasone suppression test ratio; SASS, Social Adaptation Self-evaluation Scale; EQ-5D, Euro Quality of Life 5-dimensions questionnaire; VAS, Visual Analogue Scale.

Correlations between cortisol values calculated from transformed variables, outliers excluded.
