# Supplementary material for: Childhood Maltreatment and Its Interaction with Hypothalamic–Pituitary–Adrenal Axis Activity and the Remission Status of Major Depression: Effects on Functionality and Quality of Life
Source: MDPI journal article supplement (doi:10.3390/brainsci11040495), 2021-04-13
Supplement: s1 [file s1]

**Table S6.** Results of multiple linear regression analyses exploring the association of childhood maltreatment, HPA axis function, and MDD remission status with quality of life (EQ-5D – Index scores) in MDD patients (n=97).

|                               | Model 1<br>R <sup>2</sup> = 0.114 |       | Model 2<br>R <sup>2</sup> = 0.565 |       | Model 3<br>R <sup>2</sup> = 0.642 |       | Model 4<br>R <sup>2</sup> = 0.676 |       | Final model<br>R <sup>2</sup> = 0.715 |       |
|-------------------------------|-----------------------------------|-------|-----------------------------------|-------|-----------------------------------|-------|-----------------------------------|-------|---------------------------------------|-------|
|                               | β                                 | p     | β                                 | p     | β                                 | p     | β                                 | p     | β                                     | P     |
| CTQ- emotional abuse          | -0.168                            | 0.411 | 0.083                             | 0.591 | 0.077                             | 0.659 | 0.134                             | 0.481 | 0.046                                 | 0.802 |
| CTQ- physical abuse           | -0.042                            | 0.808 | -0.191                            | 0.144 | -0.187                            | 0.218 | -0.255                            | 0.119 | -0.230                                | 0.139 |
| CTQ- sexual abuse             | -0.032                            | 0.829 | -0.108                            | 0.314 | -0.128                            | 0.266 | -0.176                            | 0.156 | -0.163                                | 0.169 |
| CTQ- emotional neglect        | -0.199                            | 0.261 | 0.078                             | 0.564 | 0.048                             | 0.729 | 0.051                             | 0.734 | 0.026                                 | 0.859 |
| CTQ- physical neglect         | 0.036                             | 0.823 | -0.089                            | 0.449 | -0.058                            | 0.642 | -0.099                            | 0.449 | -0.074                                | 0.554 |
| STAI - state                  |                                   |       | -0.328                            | 0.021 | -0.200                            | 0.207 | -0.227                            | 0.162 | -0.228                                | 0.141 |
| STAI - trait                  |                                   |       | -0.489                            | 0.003 | -0.455                            | 0.011 | -0.371                            | 0.057 | -0.471                                | 0.016 |
| Gender                        |                                   |       |                                   |       | 0.081                             | 0.484 | 0.053                             | 0.654 | 0.089                                 | 0.439 |
| Age                           |                                   |       |                                   |       | -0.090                            | 0.531 | -0.119                            | 0.411 | -0.175                                | 0.215 |
| Years of education            |                                   |       |                                   |       | 0.037                             | 0.761 | 0.002                             | 0.989 | 0.047                                 | 0.706 |
| BMI                           |                                   |       |                                   |       | -0.034                            | 0.769 | -0.062                            | 0.637 | -0.052                                | 0.679 |
| Tobacco consumption (cig/day) |                                   |       |                                   |       | -0.154                            | 0.186 | -0.188                            | 0.128 | -0.251                                | 0.041 |
| Remitted MDD                  |                                   |       |                                   |       | 0.297                             | 0.042 | 0.338                             | 0.026 | 0.209                                 | 0.177 |
| PSQI                          |                                   |       |                                   |       | 0.043                             | 0.774 | 0.055                             | 0.736 | 0.072                                 | 0.643 |
| Waking cortisol               |                                   |       |                                   |       |                                   |       | 0.156                             | 0.249 | 0.108                                 | 0.409 |
| CAR                           |                                   |       |                                   |       |                                   |       | 0.053                             | 0.717 | -0.208                                | 0.268 |
| DSTR                          |                                   |       |                                   |       |                                   |       | -0.056                            | 0.641 | -0.038                                | 0.740 |
| Diurnal cortisol slope        |                                   |       |                                   |       |                                   |       | 0.157                             | 0.202 | 0.175                                 | 0.138 |
| CAR x Remitted MDD            |                                   |       |                                   |       |                                   |       |                                   |       | 0.356                                 | 0.039 |

EQ-5D – Index score was considered as the dependent variable.

β: standardized beta coefficient.

Abbreviations: MDD, major depressive disorder; EQ-5D, Euro Quality of Life 5-dimensions questionnaire; CTQ, Childhood Trauma Questionnaire; STAI, State-Trait Anxiety Inventory; BMI, body mass index; PSQI, Pittsburgh Sleep Quality Index; CAR, cortisol awakening response calculated to the increase in cortisol; DSTR, dexamethasone suppression test ratio.

Analyses performed using transformed cortisol variables, outliers excluded.

Non-significant interaction terms were excluded in the final equation.
