# Supplementary material for: Childhood Maltreatment and Its Interaction with Hypothalamic–Pituitary–Adrenal Axis Activity and the Remission Status of Major Depression: Effects on Functionality and Quality of Life
Source: MDPI journal article supplement (doi:10.3390/brainsci11040495), 2021-04-13
Supplement: s1 [file s1]

**Table S1.** Sample characteristics, clinical variables and cortisol measures by study groups (adapted from Salvat-Pujol et al., 2017)<sup>1</sup>.

|                                              | HC<br>n=97    | Remitted MDD<br>n=44 | Non-remitted MDD<br>n=53 | Statistics<br>(ANOVA / T-test / $\chi^2$ ) |
|----------------------------------------------|---------------|----------------------|--------------------------|--------------------------------------------|
| Age (years)                                  | 56.59 (11.86) | 62.09 (11.69)        | 57.89 (11.48)            | F(193)=3.353, p=0.037 <sup>a</sup>         |
| Female gender, n (%)                         | 64 (66.0)     | 29 (65.9)            | 39 (73.6)                | $\chi^2=1.031$ , p= 0.597                  |
| Education (years)                            | 12.10 (4.06)  | 8.50 (4.29)          | 9.15 (4.04)              | F(193)=15.477, p<0.001 <sup>a,b</sup>      |
| BMI (kg/m <sup>2</sup> )                     | 26.75 (4.87)  | 27.88 (4.28)         | 29.72 (5.33)             | F(192)=6.329, p=0.002 <sup>b</sup>         |
| PSQI                                         | 5.19 (3.31)   | 6.51 (3.44)          | 11.53 (4.70)             | F(167)=42.017, p<0.001 <sup>b,c</sup>      |
| Substance use                                |               |                      |                          |                                            |
| Smoking, n (%)                               | 16 (16.5)     | 11 (25.0)            | 14 (26.4)                | $\chi^2=2.638$ , p= 0.267                  |
| Tobacco consumption (cigarettes/day)         | 2.35 (7.40)   | 3.20 (6.67)          | 3.96 (8.73)              | F(193)=0.788, p=0.456                      |
| Daily alcohol intake, n (%)                  | 31 (32.0)     | 16 (36.4)            | 10 (18.9)                | $\chi^2=4.423$ , p=0.110                   |
| Daily alcohol intake (g/day)                 | 2.52 (6.10)   | 1.92 (3.59)          | 1.37 (3.92)              | F(173)=0.821, p=0.442                      |
| Clinical variables                           |               |                      |                          |                                            |
| STAI - state                                 | 11.10 (6.69)  | 17.57 (10.76)        | 34.17 (12.91)            | F(193)=97.583, p<0.001 <sup>a,b,c</sup>    |
| STAI - trait                                 | 15.73 (9.08)  | 20.45 (11.76)        | 38.67 (10.33)            | F(178)=83.239, p<0.001 <sup>a,b,c</sup>    |
| HDRS                                         | 0.71 (1.14)   | 2.48 (2.32)          | 17.57 (6.81)             | F(193)=357.048, p<0.001 <sup>a,b,c</sup>   |
| Suicide attempts, n (%)                      | 0 (0)         | 9 (20.5)             | 15 (28.3)                | $\chi^2=28.754$ , p<0.001                  |
| Suicide attempts                             | 0 (0)         | 0.31 (0.92)          | 0.45 (0.93)              | F(191)=9.156, p<0.001 <sup>a,b</sup>       |
| Age of onset (years)*                        | NA            | 42.38 (13.02)        | 41.61 (14.60)            | t(89)=0.263, p=0.793                       |
| Melancholic symptoms, n (%)*                 | NA            | 35 (79.5)            | 46 (86.8)                | $\chi^2=1.699$ , p=0.428                   |
| Atypical symptoms, n (%)*                    | NA            | 0 (0)                | 3 (5.7)                  | $\chi^2=2.512$ , p=0.250                   |
| Number of depressive episodes*               | NA            | 3.89 (2.89)          | 3.71 (2.19)              | t(94)=0.337, p=0.737                       |
| Number of hospitalizations*                  | NA            | 0.60 (1.22)          | 1.04 (1.97)              | t(88)=-1.237, p=0.197                      |
| Cortisol measures                            |               |                      |                          |                                            |
| Waking cortisol (nmol/L) (T1)                | 16.63 (8.16)  | 15.83 (7.86)         | 17.83 (10.95)            | F(173)=0.643, p=0.527                      |
| 30 min post-awakening cortisol (nmol/L) (T2) | 22.90 (10.70) | 22.43 (12.45)        | 22.00 (12.36)            | F(174)=0.266, p=0.767                      |
| 60 min post-awakening cortisol (nmol/L) (T3) | 17.17 (8.76)  | 17.22 (11.05)        | 19.08 (11.07)            | F(174)=0.500, p=0.607                      |
| 10-h cortisol (nmol/L) (T4)                  | 11.53 (10.72) | 11.41 (8.10)         | 13.50 (9.74)             | F(174)=0.949, p=0.389                      |
| 23-h cortisol (nmol/L) (T5)                  | 3.07 (2.41)   | 3.34 (2.74)          | 3.89 (2.28)              | F(180)=3.344, p=0.038 <sup>b</sup>         |
| 10-h post-DXM cortisol (nmol/L) (T6)         | 5.02 (5.37)   | 6.75 (8.04)          | 6.89 (7.85)              | F(179)=2.359, p=0.097                      |
| CAR†                                         | 19.67 (54.08) | 28.40 (61.56)        | 14.08 (56.28)            | F(170)=0.656, p=0.520                      |
| DSTR‡                                        | 9.62 (19.69)  | 3.66 (4.13)          | 6.62 (10.90)             | F(179)=2.180, p=0.116                      |
| Diurnal cortisol slope                       | -0.15 (0.11)  | -0.13 (0.14)         | -0.15 (0.11)             | F(171)=0.214, p=0.808                      |

<sup>1</sup>Salvat-Pujol N, et al. 2017. Hypothalamic-pituitary-adrenal axis activity and cognition in major depression: The role of remission status. Psychoneuroendocrinology 76:38–48. Abbreviations: HC, healthy controls; MDD, major depressive disorder; BMI, body mass index; PSQI, Pittsburgh Sleep Quality Index; STAI: State-Trait Anxiety Inventory; HDRS, Hamilton Depression Rating Scale; DXM, dexamethasone; CAR, cortisol awakening response calculated to the increase; DSTR, dexamethasone suppression test ratio.

All variables presented in mean (SD) or n (%).

Cortisol raw scores and untransformed DSTR are shown, outliers excluded. P values calculated upon transformed cortisol and DSTR values, outliers excluded.

†CAR were calculated with transformed cortisol values.

‡DSTR= 10-h cortisol/10-h post-DXM cortisol.

NA: not applicable.

\* Statistical analyses performed using only Remitted MDD and Non-remitted MDD groups.

<sup>a</sup> Significant ANOVA post hoc analyses (comparison between groups) with Bonferroni correction: HC vs. remitted MDD.

<sup>b</sup> Significant ANOVA post hoc analyses (comparison between groups) with Bonferroni correction: HC vs. non-remitted MDD.

<sup>c</sup> Significant ANOVA post hoc analyses (comparison between groups) with Bonferroni correction: remitted MDD vs. non-remitted MDD.
