# Supplementary material for: Childhood Maltreatment and Its Interaction with Hypothalamic–Pituitary–Adrenal Axis Activity and the Remission Status of Major Depression: Effects on Functionality and Quality of Life
Source: MDPI journal article supplement (doi:10.3390/brainsci11040495), 2021-04-13
Supplement: s1 [file s1]

**Table S3.** Results of partial correlation analyses in patients with remitted MDD.

|                         | CTQ -<br>emotion<br>al abuse | CTQ -<br>physical<br>abuse | CTQ -<br>sexual<br>abuse | CTQ -<br>emotional<br>neglect | CTQ -<br>physical<br>neglect | CTQ -<br>total<br>score | STAI -<br>state | STAI -<br>trait | Waking<br>cortisol<br>(nmol/L) | †CAR   | ‡DSTR  | Diurnal<br>cortisol<br>slope | SASS   | EQ-5D –<br>Index | EQ-5D –<br>VAS |
|-------------------------|------------------------------|----------------------------|--------------------------|-------------------------------|------------------------------|-------------------------|-----------------|-----------------|--------------------------------|--------|--------|------------------------------|--------|------------------|----------------|
| CTQ - emotional abuse   | 1                            | 0.630**                    | 0.542**                  | 0.238                         | -0.146                       | 0.791*                  | 0.351           | 0.314           | 0.144                          | -0.190 | 0.031  | -0.170                       | -0.195 | -0.386           | -0.580**       |
| CTQ - physical abuse    | 0.630**                      | 1                          | 0.116                    | -0.102                        | -0.129                       | 0.461*                  | 0.221           | 0.145           | 0.200                          | 0.206  | -0.119 | -0.052                       | -0.107 | -0.338           | -0.326         |
| CTQ - sexual abuse      | 0.542**                      | 0.116                      | 1                        | 0.102                         | 0.064                        | 0.553*                  | 0.282           | 0.078           | -0.002                         | -0.086 | 0.046  | -0.125                       | 0.166  | -0.144           | -0.234         |
| CTQ - emotional neglect | 0.238                        | -0.102                     | 0.102                    | 1                             | 0.252                        | 0.693*                  | -0.112          | 0.144           | -0.311                         | -0.068 | 0.168  | -0.236                       | 0.082  | -0.127           | -0.104         |
| CTQ - physical neglect  | -0.146                       | -0.129                     | 0.064                    | 0.252                         | 1                            | 0.261                   | 0.188           | -0.095          | 0.053                          | -0.052 | 0.206  | -0.086                       | 0.189  | -0.268           | 0.099          |
| CTQ - total score       | 0.791**                      | 0.461*                     | 0.553**                  | 0.693**                       | 0.261                        | 1                       | 0.239           | 0.241           | -0.053                         | -0.086 | 0.125  | -0.258                       | 0.019  | -0.399           | -0.407*        |
| STAI - state            | 0.351                        | 0.221                      | 0.282                    | -0.112                        | 0.188                        | 0.239                   | 1               | 0.384           | -0.056                         | 0.157  | 0.311  | 0.050                        | -0.177 | -0.402           | -0.254         |
| STAI - trait            | 0.314                        | 0.145                      | 0.078                    | 0.144                         | -0.095                       | 0.241                   | 0.384           | 1               | 0.079                          | 0.207  | 0.289  | -0.325                       | -0.216 | -0.495*          | -0.382         |
| Waking cortisol         | 0.144                        | 0.200                      | -0.002                   | -0.311                        | 0.053                        | -0.053                  | -0.056          | 0.079           | 1                              | -0.323 | 0.053  | -0.182                       | 0.136  | -0.167           | -0.044         |
| †CAR                    | -0.190                       | 0.206                      | -0.086                   | -0.068                        | -0.052                       | -0.086                  | 0.157           | 0.207           | -0.323                         | 1      | -0.066 | -0.198                       | -0.060 | -0.150           | -0.179         |
| ‡DSTR                   | 0.031                        | -0.119                     | 0.046                    | 0.168                         | 0.206                        | 0.125                   | 0.311           | 0.289           | 0.053                          | -0.066 | 1      | -0.395                       | -0.134 | -0.216           | -0.070         |
| Diurnal cortisol slope  | -0.170                       | -0.052                     | -0.125                   | -0.236                        | -0.086                       | -0.258                  | 0.050           | -0.325          | -0.182                         | -0.198 | -0.395 | 1                            | 0.030  | 0.457*           | 0.433*         |
| SASS                    | -0.195                       | -0.107                     | 0.166                    | 0.082                         | 0.189                        | 0.019                   | -0.177          | -0.216          | 0.136                          | -0.060 | -0.134 | 0.030                        | 1      | 0.154            | 0.400          |
| EQ-5D – Index           | -0.386                       | -0.338                     | -0.144                   | -0.127                        | -0.268                       | -0.399                  | -0.402          | -0.495*         | -0.167                         | -0.150 | -0.216 | 0.457*                       | 0.154  | 1                | 0.349          |
| EQ-5D – VAS             | -0.580**                     | -0.326                     | -0.234                   | -0.104                        | 0.099                        | -                       | -0.254          | -0.382          | -0.044                         | -0.179 | -0.070 | 0.433*                       | 0.400  | 0.349            | 1              |

Partial correlation analyses adjusted by gender, age, and years of education.

Pearson's correlation coefficients are shown. Significant results are marked with asterisks (\*  $p < 0.05$ ; \*\*  $p < 0.01$ ).

Abbreviations: MDD, major depressive disorder; CTQ, Childhood Trauma Questionnaire; STAI: State-Trait Anxiety Inventory; CAR, cortisol awakening response calculated to the increase; DSTR, dexamethasone suppression test ratio; SASS, Social Adaptation Self-evaluation Scale; EQ-5D, Euro Quality of Life 5-dimensions questionnaire; VAS, Visual Analogue Scale.

Correlations between cortisol values calculated from transformed variables, outliers excluded.
